# Supplementary material for: Transmissibility of coronavirus disease 2019 in Chinese cities with different dynamics of imported cases
Source: PubMed Central journal article supplement (PMC7651459; doi:10.7717/peerj.10350), 2020-11-06
Supplement: peerj-08-10350-s001.pdf [file peerj-08-10350-s001.pdf]

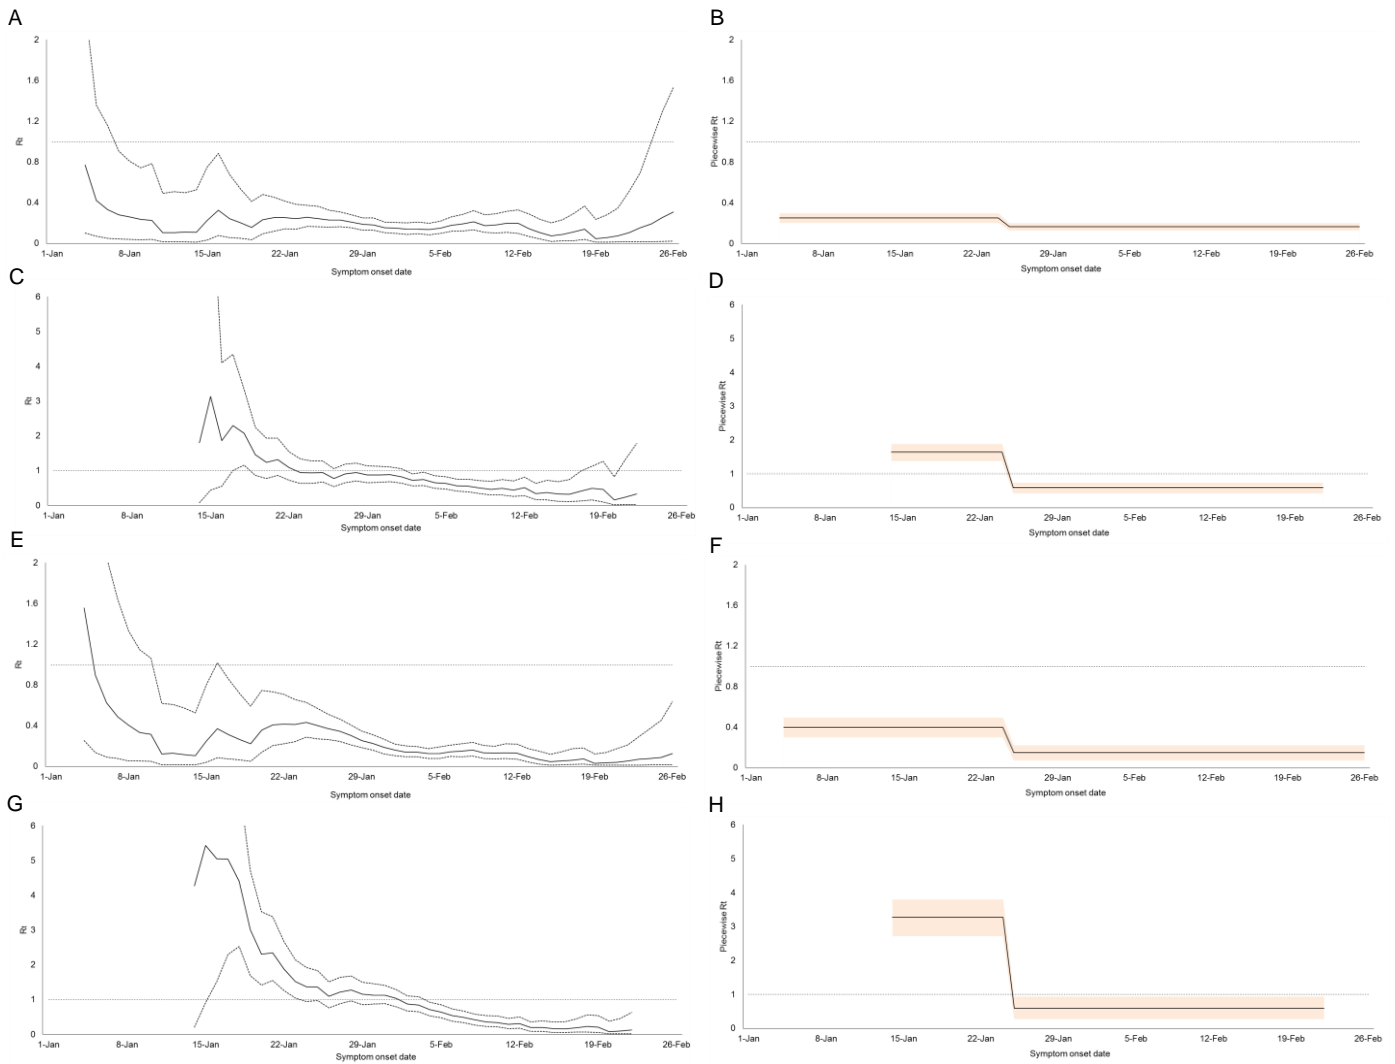

Figure S1. Time-varying reproduction number ( $R_t$ ) (left panel) and piecewise  $R_t$  (right panel) assuming a shorter (A-D) and longer serial interval (E-H) in Shenzhen (A, B, E, and F) and Hangzhou (C, D, G, and H) respectively.

Table S1. Number of local and imported cases by illness onset date in Hangzhou, China

| Illness onset date | Number of local cases | Number of Imported cases |
|--------------------|-----------------------|--------------------------|
| 01/01/2020         | 0                     | 0                        |
| 01/02/2020         | 0                     | 0                        |
| 01/03/2020         | 0                     | 0                        |
| 01/04/2020         | 0                     | 0                        |
| 01/05/2020         | 0                     | 0                        |
| 01/06/2020         | 0                     | 0                        |
| 01/07/2020         | 0                     | 0                        |
| 01/08/2020         | 0                     | 0                        |
| 01/09/2020         | 0                     | 0                        |
| 01/10/2020         | 0                     | 0                        |
| 01/11/2020         | 0                     | 0                        |
| 01/12/2020         | 0                     | 0                        |
| 01/13/2020         | 0                     | 1                        |
| 01/14/2020         | 0                     | 0                        |
| 01/15/2020         | 1                     | 2                        |
| 01/16/2020         | 2                     | 0                        |
| 01/17/2020         | 4                     | 2                        |
| 01/18/2020         | 6                     | 0                        |
| 01/19/2020         | 2                     | 1                        |
| 01/20/2020         | 2                     | 4                        |
| 01/21/2020         | 7                     | 2                        |
| 01/22/2020         | 2                     | 2                        |
| 01/23/2020         | 2                     | 1                        |
| 01/24/2020         | 4                     | 5                        |
| 01/25/2020         | 9                     | 3                        |
| 01/26/2020         | 4                     | 6                        |
| 01/27/2020         | 11                    | 3                        |
| 01/28/2020         | 11                    | 2                        |
| 01/29/2020         | 9                     | 4                        |
| 01/30/2020         | 7                     | 3                        |
| 01/31/2020         | 8                     | 1                        |
| 02/01/2020         | 5                     | 3                        |
| 02/02/2020         | 3                     | 1                        |
| 02/03/2020         | 5                     | 2                        |
| 02/04/2020         | 3                     | 0                        |
| 02/05/2020         | 6                     | 0                        |
| 02/06/2020         | 1                     | 0                        |
| 02/07/2020         | 2                     | 0                        |
| 02/08/2020         | 1                     | 0                        |
| 02/09/2020         | 0                     | 0                        |
| 02/10/2020         | 0                     | 1                        |
| 02/11/2020         | 1                     | 0                        |
| 02/12/2020         | 2                     | 0                        |
| 02/13/2020         | 0                     | 0                        |
| 02/14/2020         | 0                     | 0                        |
| 02/15/2020         | 0                     | 0                        |
| 02/16/2020         | 0                     | 0                        |
| 02/17/2020         | 0                     | 0                        |
| 02/18/2020         | 0                     | 0                        |
| 02/19/2020         | 0                     | 0                        |
| 02/20/2020         | 0                     | 0                        |
| 02/21/2020         | 0                     | 0                        |
| 02/22/2020         | 0                     | 0                        |
| 02/23/2020         | 0                     | 0                        |
| 02/24/2020         | 0                     | 0                        |
| 02/25/2020         | 0                     | 0                        |
| 02/26/2020         | 0                     | 0                        |

Table S2. Number of local and imported cases by illness onset date in Shenzhen, China

| Illness onset date | Number of local cases | Number of Imported cases |
|--------------------|-----------------------|--------------------------|
| 01/01/2020         | 0                     | 2                        |
| 01/02/2020         | 0                     | 0                        |
| 01/03/2020         | 1                     | 1                        |
| 01/04/2020         | 0                     | 3                        |
| 01/05/2020         | 0                     | 0                        |
| 01/06/2020         | 0                     | 1                        |
| 01/07/2020         | 0                     | 0                        |
| 01/08/2020         | 0                     | 1                        |
| 01/09/2020         | 0                     | 1                        |
| 01/10/2020         | 0                     | 0                        |
| 01/11/2020         | 0                     | 1                        |
| 01/12/2020         | 0                     | 3                        |
| 01/13/2020         | 0                     | 1                        |
| 01/14/2020         | 0                     | 0                        |
| 01/15/2020         | 1                     | 1                        |
| 01/16/2020         | 1                     | 6                        |
| 01/17/2020         | 0                     | 4                        |
| 01/18/2020         | 0                     | 7                        |
| 01/19/2020         | 0                     | 13                       |
| 01/20/2020         | 3                     | 16                       |
| 01/21/2020         | 3                     | 13                       |
| 01/22/2020         | 3                     | 25                       |
| 01/23/2020         | 5                     | 30                       |
| 01/24/2020         | 8                     | 32                       |
| 01/25/2020         | 5                     | 20                       |
| 01/26/2020         | 4                     | 27                       |
| 01/27/2020         | 5                     | 22                       |
| 01/28/2020         | 4                     | 15                       |
| 01/29/2020         | 1                     | 13                       |
| 01/30/2020         | 3                     | 15                       |
| 01/31/2020         | 0                     | 7                        |
| 02/01/2020         | 5                     | 18                       |
| 02/02/2020         | 2                     | 6                        |
| 02/03/2020         | 3                     | 7                        |
| 02/04/2020         | 2                     | 6                        |
| 02/05/2020         | 4                     | 8                        |
| 02/06/2020         | 3                     | 3                        |
| 02/07/2020         | 2                     | 1                        |
| 02/08/2020         | 0                     | 6                        |
| 02/09/2020         | 0                     | 3                        |
| 02/10/2020         | 0                     | 0                        |
| 02/11/2020         | 2                     | 0                        |
| 02/12/2020         | 0                     | 4                        |
| 02/13/2020         | 0                     | 2                        |
| 02/14/2020         | 0                     | 2                        |
| 02/15/2020         | 0                     | 0                        |
| 02/16/2020         | 0                     | 0                        |
| 02/17/2020         | 0                     | 0                        |
| 02/18/2020         | 0                     | 0                        |
| 02/19/2020         | 0                     | 0                        |
| 02/20/2020         | 0                     | 0                        |
| 02/21/2020         | 0                     | 0                        |
| 02/22/2020         | 0                     | 0                        |
| 02/23/2020         | 0                     | 1                        |
| 02/24/2020         | 0                     | 0                        |
| 02/25/2020         | 0                     | 0                        |
| 02/26/2020         | 0                     | 0                        |
